# Supplementary material for: A nano-surface monocrystalline BiVO4 nanoplate photoanode for enhanced photoelectrochemical performance
Source: Royal Society of Chemistry journal article supplement (doi:10.1039/d1nj00658d), 2021-01-01
Supplement: d1nj00658d1.pdf [file d1nj00658d1.pdf]

Supporting Information

# Nano-surface Monocrystalline BiVO<sub>4</sub> Nanoplate Photoanode for Enhanced Photoelectrochemical Performance

Bin Gao,<sup>a</sup> Tao Wang,<sup>\*a</sup> Hairong Xue,<sup>a</sup> Cheng Jiang,<sup>a</sup> Lei Sheng,<sup>a</sup> Xianli Huang,<sup>a</sup> Jianping He,<sup>\*a</sup>

<sup>a</sup> College of Materials Science and Technology, Jiangsu Key Laboratory of Electrochemical Energy Storage Technologies, Nanjing University of Aeronautics and Astronautics, 211106, Nanjing, P.R. China.

\*Corresponding Author, E-mail: wangtao0729@nuaa.edu.cn; jianph@nuaa.edu.cn

## Experimental Section

Preparation of BiVO<sub>4</sub> photoanode (BVO):

- (1) Synthesize of BiVO<sub>4</sub>-seeds FTO glass: First, the aqueous solutions of Bi(NO<sub>3</sub>)<sub>3</sub> (0.01 M) and NH<sub>4</sub>VO<sub>3</sub> (0.01 M) were prepared separately with EDTA (0.015 M) as the complexing agent and ammonia water to adjust the pH to 10, respectively. Then, the two solutions are mixed to obtain the precursor solution. Finally, the precursor solution was spin-coated on the FTO conductive glass. The spin-coated conductive glass was calcined at 500 °C for 2 h to obtain BiVO<sub>4</sub> seeds FTO glass.
- (2) Synthesize of BiVO<sub>4</sub> photoanode: First, prepare an aqueous solution of 0.01 M Bi(NO<sub>3</sub>)<sub>3</sub> with 0.015 M EDTA as a complexing agent, and adjust the pH to 10 with 2 M NaOH solution. After the solution is clear and transparent, 0.01 M ammonium metavanadate was added. Then, the 30 ml of the above solution was transferred into a teflon reactor, and the BiVO<sub>4</sub>-seed FTO glass was placed in it. Next, the reactor was heated at 180 °C for 3 h. Finally, the FTO glass was taken out and calcined at 500 °C for 4 h to obtain The BiVO<sub>4</sub> photoanode.

Preparation of nano-surface BiVO<sub>4</sub> photoanode (NBV):

- (1) Synthesize of BiVO<sub>4</sub>/SiO<sub>2</sub> photoanode: First, the BiVO<sub>4</sub> photoanode is immersed in the 30 ml of ethanol solution with 0.5 ml tetraethyl orthosilicate at 60 °C for 30 min. Then, the photoanode is washed by ethanol and calcined at 300 °C for 1h to obtain the BiVO<sub>4</sub>/SiO<sub>2</sub> photoanode.
- (2) Synthesize of nano-surface BiVO<sub>4</sub> photoanode: First, the BiVO<sub>4</sub>/SiO<sub>2</sub> photoanode is immersed in the solution of H<sub>2</sub>C<sub>2</sub>O<sub>4</sub> (0.01 M) for 10 min with illumination. Then, the photoanode is immersed in the solution of KOH (1 M) to remove the SiO<sub>2</sub>. Finally, the photoanode is rinsed clean and the nano-surface BiVO<sub>4</sub> photoanode is obtained.

Characterization

The scanning electron microscope images (SEM) are obtained on the field emission scanning electron microscope (Hitachi, Co. S4800). The high-resolution transmission electron microscopy images (HRTEM) are collected by the transmission electron microscope (JEOL, 2100F). The X-ray diffractometer (Bruker, D8) with Cu K $\alpha$  radiation is used to obtain the X-ray diffraction spectra (XRD). The diffuse reflectance ultraviolet-visible spectra (UV-Vis) is collected by the UV-Vis spectrophotometry (Shimadzu, UV-3600). The X-ray photoelectron spectroscopy (ESCALab220i-XL) is used to obtain the X-ray photoelectron spectra (XPS).

(Photo)electrochemical measurements

The electrochemical measurements are performed on the electrochemical workstation (Zahner, IM6) with the platinum gauze electrode as the counter electrode, the saturated calomel electrode as the reference electrode and the as-prepared photoanode as the work electrode. The electrolyte is the phosphate buffer solution (0.2 M, pH=7). The illumination is provided by the xenon lamp (Perfectlight, PLS-SXE300D, China) with the AM 1.5 G light filter.

The electrochemically active area of the photoanode is obtained by the cyclic voltammogram method. The electrolyte is 5mM K<sub>3</sub>Fe(CN)<sub>6</sub> in 0.1 M KCl solution. The scan rate is set to 5, 10, 25, 50, 75, 100, 200 mV s<sup>-1</sup>. The real electrochemically active area can be obtained by Randle-Sevcik equation:

$$I_p = 2.69 \times 10^5 n^{3/2} A D^{1/2} C v^{1/2}$$

Where  $I_p$  is the oxidation peak current,  $n$  is the electron transferred number ( $n = 1$ ),  $A$  is the electrochemically active area,  $D$  is the diffusion constant of ferrous cyanide ( $D = 6.7 \times 10^{-6}$  cm<sup>2</sup> s<sup>-1</sup>),  $C$  is the concentration of ferrous cyanide and the  $v$  is scan rate.

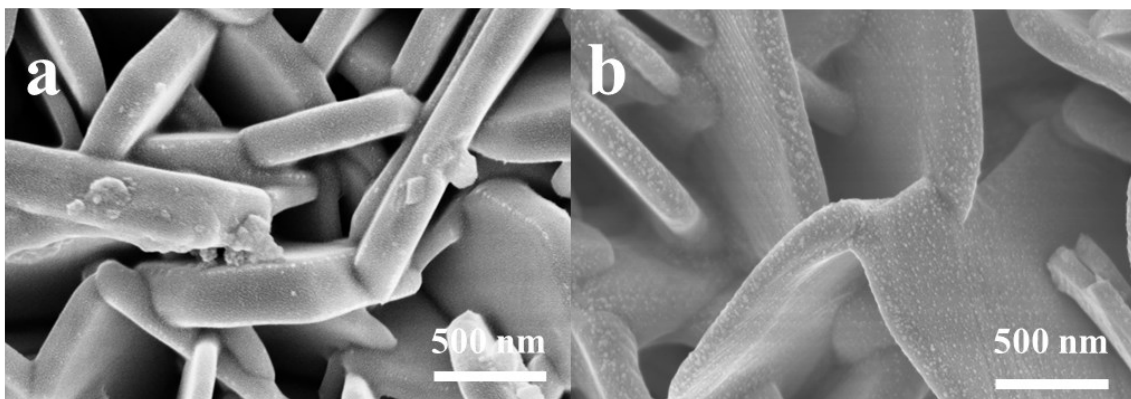

Figure S1. SEM image of BiVO<sub>4</sub>/SiO<sub>2</sub> (a) and directly etched BiVO<sub>4</sub> (b).

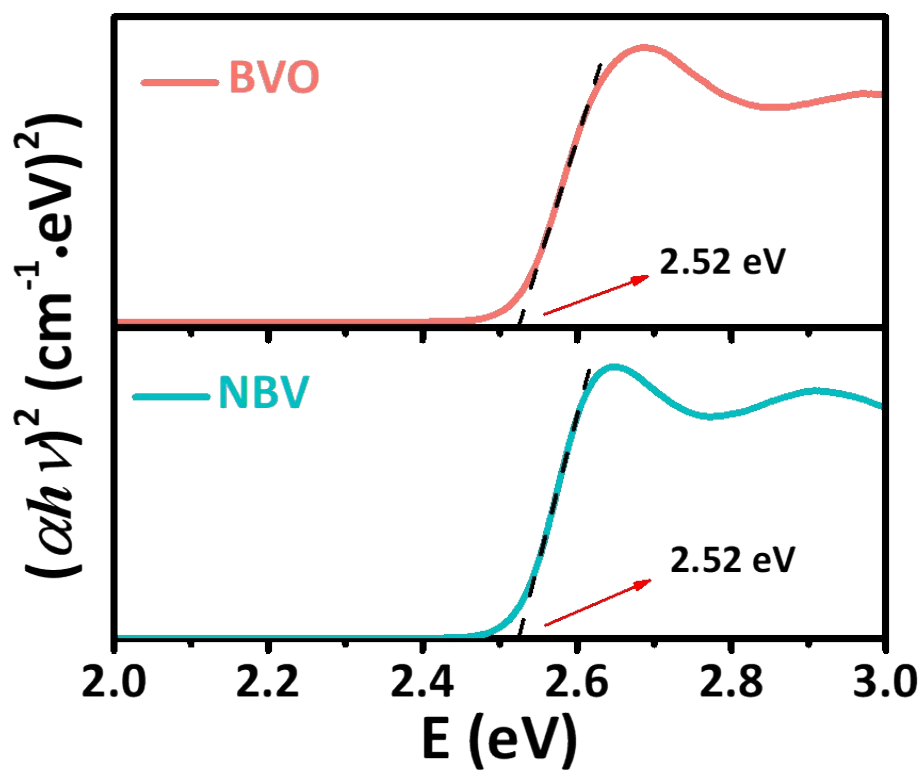

Figure S2. Tauc plots of BVO and NBV photoanodes.

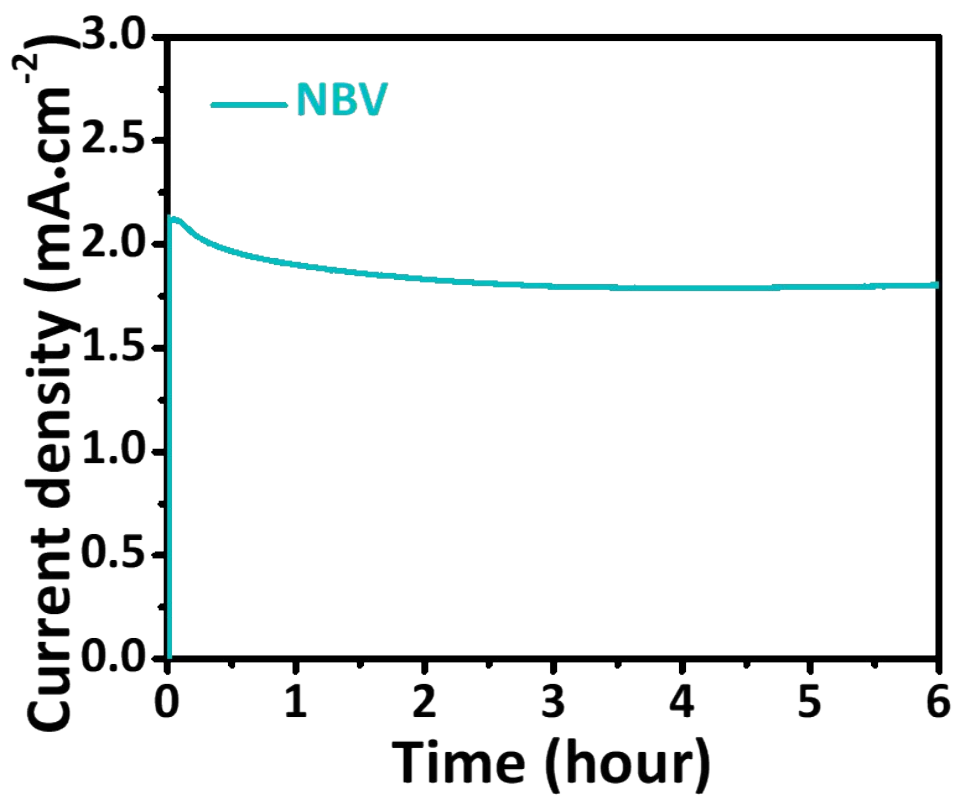

Figure S3. Stability test of NBV photoanode.

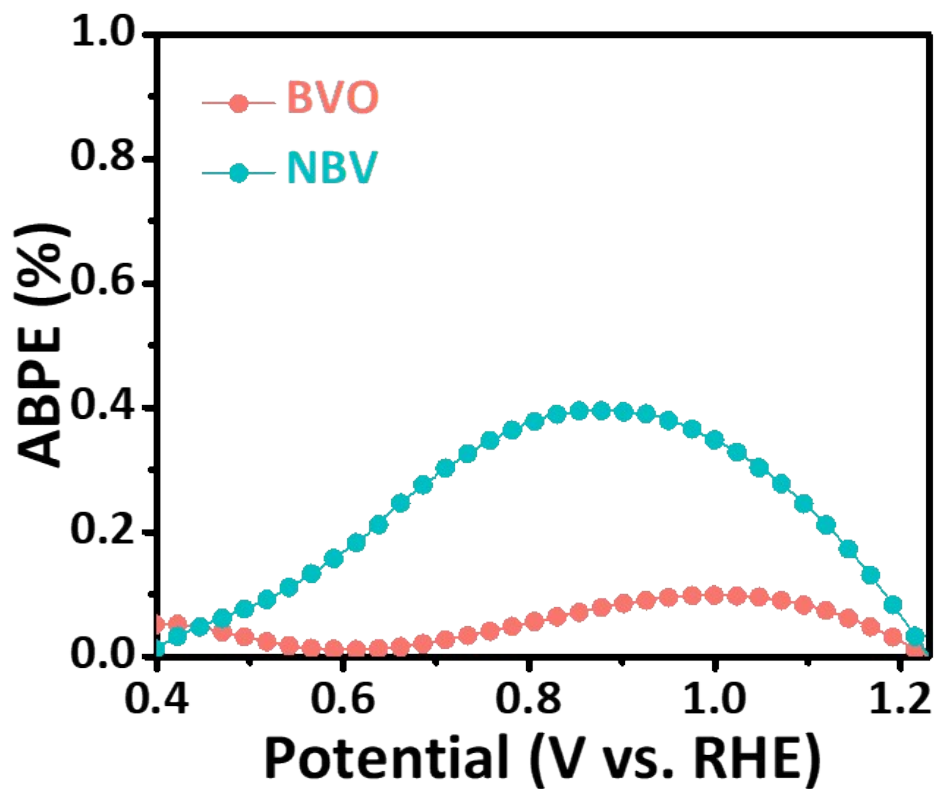

Figure S4. The applied bias photo-to-current efficiency (ABPE) of photoanodes.

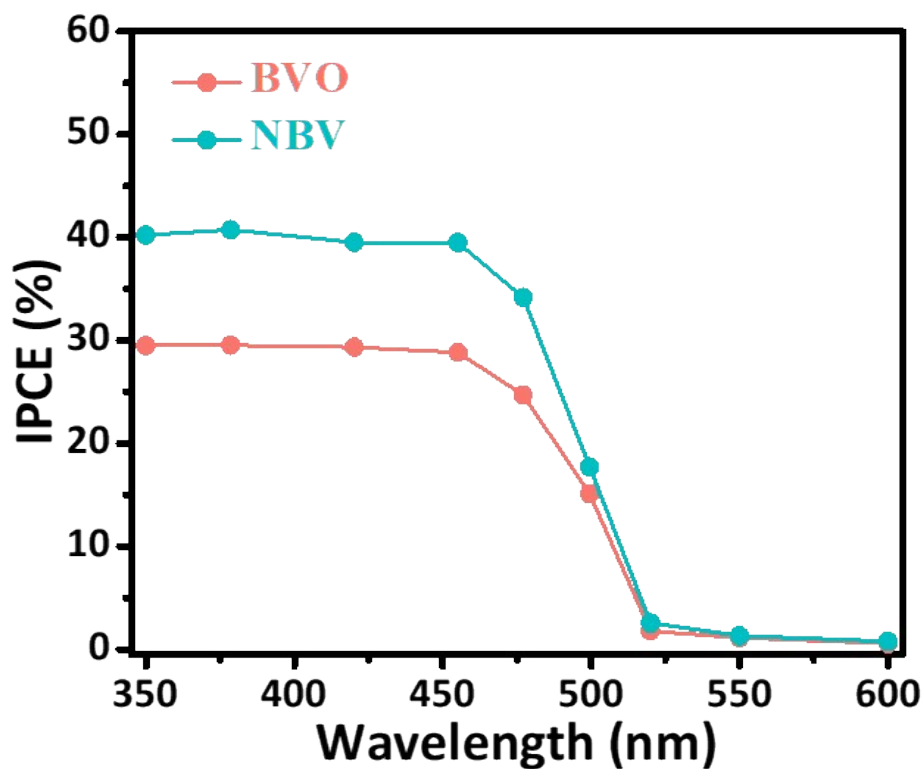

Figure S5. Incident photo-to-electron conversion efficiency (IPCE) of BVO and NBV photoanodes.

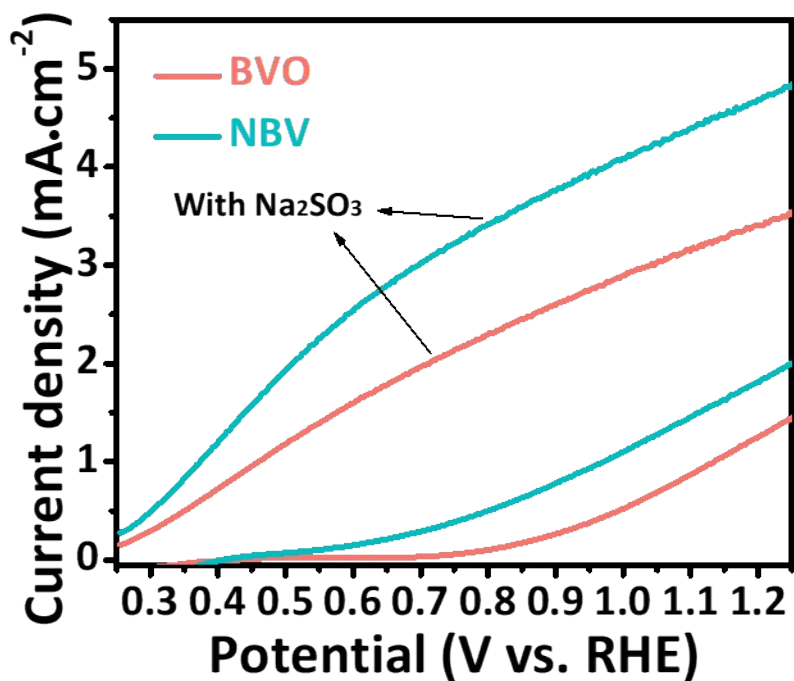

Figure S6. Sulfite oxidation and water oxidation curves of photoanodes.

Table S1 Summary of BiVO<sub>4</sub> photoanode with oxygen vacancies

| Treatment method            | Onset potential (V vs. RHE) | Onset potential with oxygen vacancies (V vs. RHE) | Photocurrent density (mA cm <sup>-2</sup> , 1.23 V vs. RHE) | Photocurrent density with oxygen vacancies (mA cm <sup>-2</sup> , 1.23 V vs. RHE) | Ref.      |
|-----------------------------|-----------------------------|---------------------------------------------------|-------------------------------------------------------------|-----------------------------------------------------------------------------------|-----------|
| Hydrogenation               | 0.53                        | 0.53                                              | 1.5                                                         | 3                                                                                 | 1         |
| Electrochemically Treatment | None                        | None                                              | 0.25                                                        | 2.5                                                                               | 2         |
| Hydrogenation               | None                        | None                                              | 0.2                                                         | 2.1                                                                               | 3         |
| Etch                        | 0.7                         | 0.4                                               | 1.5                                                         | 2.0                                                                               | This work |

1. Y. Zhang, D. Wang, X. Zhang, Y. Chen, L. Kong, P. Chen, Y. Wang, C. Wang, L. Wang, Y. Liu, *Electrochim. Acta*, 2016, **195**, 51-58.
2. S. Wang, P. Chen, J. Yun, Y. Hu, L. Wang, *Angew. Chem. Int. Ed.*, 2017, **56**, 8500-8504.
3. G. Wang, Y. Ling, X. Lu, F. Qian, Y. Tong, J. Z. Zhang, V. Lordi, C. R. Leao, Y. Li, *J. Phys. Chem. C*, 2013, **117**, 10957-10964.
